# Supplementary material for: The Spatial Patterns and Determinants of Cerebrospinal Fluid Circulation in the Human Brain
Source: PubMed Central journal article supplement — bioRxiv. 2023 Aug 15:2023.08.13.553149. Preprint. [Version 1] doi: 10.1101/2023.08.13.553149 (PMC10462043; doi:10.1101/2023.08.13.553149), 2023-08-15

M $\Psi$

MSD

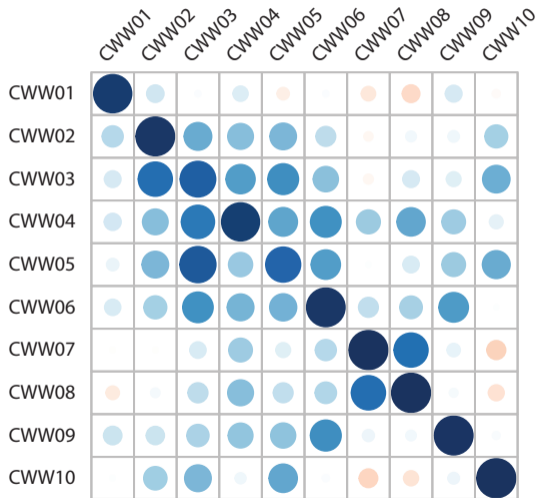

FA

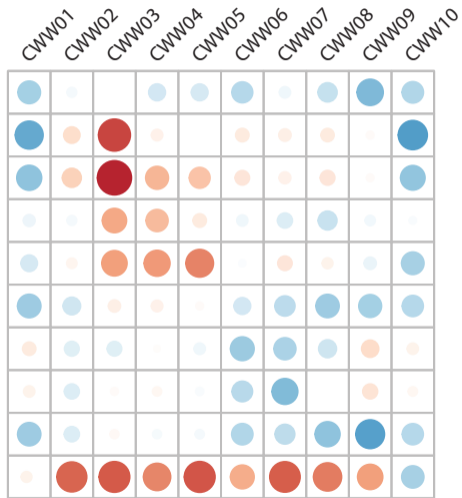

M $\Psi$  Variability

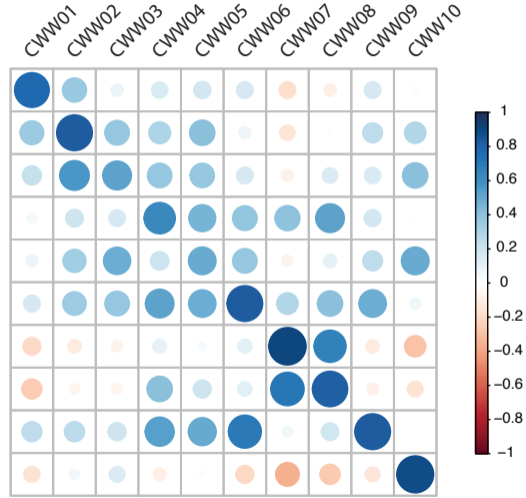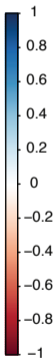

Supplement: media-1.pdf [file media-1.pdf]
